# Supplementary material for: Autoantibodies as diagnostic markers and potential drivers of inflammation in ulcerative colitis
Source: PLoS One. 2020 Feb 12;15(2):e0228615. doi: 10.1371/journal.pone.0228615 (PMC7015398; doi:10.1371/journal.pone.0228615)
Supplement: S1 Table — (XLSX) [file pone.0228615.s002.xlsx]

## Sheet: Supplemental Table S1
Supplementary Data Table S1: 697 features found significant on proteinarrays different among UC versus Non-UC
Antigens which are differentially expressed among classes:
Number of antigenes that passed filtering criteria: 6230 (detailled settings for data-preprocessing in BRB-array tools are given at the bottom of the table).
Number of antigens significant at 0.01 level of the univariate test: 697
Table - Sorted by "fold change" between classes (derived from geometric mean of microarray fluorescent values)
Class 1: case (UC); Class 2: control(healthy)
# (order by p-value)	Parametric p-value	FDR	Geom mean of intensities in class 1	Geom mean of intensities in class 2	Fold-change	UniqueID	Name
96	0·0016529	0·0795	1282·1	640·82	2	RZPDp9027O0413Q	DMPK
7	0·0004156	0·0795	1788·2	947·7	1·89	RZPDp9027K1313Q	HES1 (includes EG:15205)
105	0·001753	0·0795	1818·41	962·46	1·89	RZPDp9027F128Q	GGA1 (includes EG:106039)
21	0·0006475	0·0795	1283·67	690·63	1·86	RZPDp9027A1813Q	RPS29
39	0·0008848	0·0795	1485·46	805·73	1·84	RZPDp9027C1612Q	CD99
455	0·005878	0·0796	937·25	513·29	1·83	RZPDp9027B0418Q	TRIM27
491	0·0065022	0·0825	2056·95	1124·54	1·83	RZPDp9027B186Q	MCM3AP
78	0·0013648	0·0795	2432·38	1374·53	1·77	RZPDp9027A1412Q	POGZ
88	0·0015698	0·0795	2069·3	1180·18	1·75	RZPDp9027H0515Q	SLC16A8
114	0·0018793	0·0795	856·75	490·21	1·75	RZPDp9027C1713Q	FLAD1
4	0·0003951	0·0795	354·27	203·84	1·74	RZPDp9027D1013Q	NBPF15 (includes others)
58	0·001114	0·0795	467·47	267·9	1·74	RZPDp9027J0210Q	SCAP
258	0·0036918	0·0795	2389·08	1371·05	1·74	RZPDp9027H1111Q	CD99
272	0·00383	0·0795	541·62	311·4	1·74	RZPDp9027C138Q	RZPDp9027C138Q
44	0·0009492	0·0795	7994·23	4619·48	1·73	RZPDp9027J2111Q	RZPDp9027J2111Q
67	0·0012119	0·0795	1889·77	1089·48	1·73	RZPDp9027D2216Q	RPS17/RPS17L
152	0·0023996	0·0795	810·49	469·71	1·73	RZPDp9027K2414Q	UBXN4
240	0·0034252	0·0795	512·57	295·68	1·73	RZPDp9027B1813Q	YES1
37	0·0008638	0·0795	1072·27	622·45	1·72	RZPDp9027A1312Q	AP2S1
171	0·0025636	0·0795	1071·97	624·53	1·72	RZPDp9027L1713Q	RZPDp9027L1713Q
1	0·0001134	0·0795	567·53	331·13	1·71	RZPDp9027M149Q	C9orf142
41	0·0009088	0·0795	3789·48	2216·4	1·71	RZPDp9027B2011Q	UXT
30	0·0007992	0·0795	503·34	295·95	1·7	RZPDp9027B1213Q	DDR1
275	0·0038452	0·0795	555·97	327·83	1·7	RZPDp9027B219Q	NACAD
77	0·0013548	0·0795	1460·75	864·73	1·69	RZPDp9027C2410Q	CAMKV
567	0·0076687	0·0839	455·29	270·61	1·68	RZPDp9027K028Q	NDRG2
33	0·0008303	0·0795	375·77	224·54	1·67	RZPDp9027N1813Q	RZPDp9027N1813Q
104	0·0017369	0·0795	304·44	182·78	1·67	RZPDp9027K2313Q	RZPDp9027K2313Q
191	0·0028244	0·0795	2546·83	1529·19	1·67	RZPDp9027F1514Q	CAMKV
290	0·0040029	0·0795	458·94	275·64	1·67	RZPDp9027N248Q	GDAP1L1
304	0·0041256	0·0795	373·25	223·85	1·67	RZPDp9027N188Q	TIAM2
381	0·0048646	0·0795	1129·56	678·18	1·67	RZPDp9027M2113Q	PSMC2
695	0·0099483	0·0892	601·25	359·32	1·67	RZPDp9027G2014Q	HNRNPC
56	0·0011024	0·0795	904·52	544·32	1·66	RZPDp9027M2110Q	AHSG
161	0·0024824	0·0795	1083·76	653·07	1·66	RZPDp9027P0713Q	ASTN2
202	0·0029756	0·0795	1209·85	729·37	1·66	RZPDp9027H1012Q	COMT
293	0·0040156	0·0795	925·34	557·76	1·66	RZPDp9027I2410Q	C17orf28
323	0·0043103	0·0795	1226·91	739·61	1·66	RZPDp9027O0814Q	PRDX1
46	0·0009772	0·0795	1914·78	1159·93	1·65	RZPDp9027E0812Q	GBF1
57	0·0011101	0·0795	3319·49	2010·33	1·65	RZPDp9027A1016Q	RZPDp9027A1016Q
61	0·0011358	0·0795	644·49	391·14	1·65	RZPDp9027P102Q	PIPSL
101	0·001712	0·0795	555·54	336·65	1·65	RZPDp9027P016Q	LDOC1
268	0·0038073	0·0795	905·88	549·79	1·65	RZPDp9027G2214Q	RASGEF1C
277	0·0038704	0·0795	1463·63	884·84	1·65	RZPDp9027J1611Q	ATP1A1
551	0·0074377	0·0839	1446·76	874·57	1·65	RZPDp9027D2410Q	ADNP
50	0·001017	0·0795	527·38	322·21	1·64	RZPDp9027F0410Q	SERPINF1
69	0·0012467	0·0795	1488·58	906·46	1·64	RZPDp9027A2311Q	METTL3
72	0·0013034	0·0795	1974·9	1203·61	1·64	RZPDp9027J0116Q	FGB
143	0·0023156	0·0795	643·01	391·18	1·64	RZPDp9027P202Q	LMNA
217	0·0031111	0·0795	2060·49	1257·44	1·64	RZPDp9027H1512Q	GRM3
274	0·0038413	0·0795	381·76	233·29	1·64	RZPDp9027E2418Q	ATP1A1
379	0·0048548	0·0795	720·3	438·2	1·64	RZPDp9027J1016Q	NAT9
443	0·0057644	0·0796	1062·51	646·81	1·64	RZPDp9027A2013Q	PRKD2
474	0·0061	0·0802	587·61	358·72	1·64	RZPDp9027N1713Q	AAAS
671	0·0096135	0·0889	1068·94	651·44	1·64	RZPDp9027A189Q	RZPDp9027A189Q
6	0·0004109	0·0795	674·93	414·24	1·63	RZPDp9027G1413Q	GBF1
29	0·0007783	0·0795	2745·91	1684·58	1·63	RZPDp9027O2211Q	GBA2
82	0·0014198	0·0795	1195·79	733·28	1·63	RZPDp9027H0712Q	DCTPP1
90	0·0015918	0·0795	562·73	344·79	1·63	RZPDp9027G108Q	LDOC1
185	0·0027469	0·0795	1045·28	640·75	1·63	RZPDp9027P1614Q	EPN1
451	0·0058441	0·0796	1783·06	1092·5	1·63	RZPDp9027B2210Q	ABHD16A
28	0·0007726	0·0795	675·7	417·22	1·62	RZPDp9027P0914Q	HADHA
54	0·0010805	0·0795	536·12	330·76	1·62	RZPDp9027L2212Q	RZPDp9027L2212Q
102	0·0017185	0·0795	1988·8	1225·49	1·62	RZPDp9027O244Q	BFAR
261	0·0037324	0·0795	1410·32	870·46	1·62	RZPDp9027P1515Q	HNRPLL
361	0·0047351	0·0795	2595·27	1600·62	1·62	RZPDp9027B2311Q	RZPDp9027B2311Q
364	0·0047715	0·0795	907·61	559·82	1·62	RZPDp9027O0416Q	ZSWIM6
433	0·0056387	0·0796	809·76	501·08	1·62	RZPDp9027O0811Q	RZPDp9027O0811Q
489	0·0064506	0·0822	2747·01	1693·28	1·62	RZPDp9027A0514Q	EFTUD1
129	0·0020317	0·0795	2820·16	1750·79	1·61	RZPDp9027O2314Q	RNF220
351	0·0046178	0·0795	656·76	408·8	1·61	RZPDp9027M1514Q	PTCHD2
380	0·0048608	0·0795	1861·23	1158·76	1·61	RZPDp9027G1013Q	KHDRBS1
399	0·0051945	0·0796	766·77	475·4	1·61	RZPDp9027N0816Q	TNFRSF25
500	0·0066385	0·0827	484·58	300·72	1·61	RZPDp9027P0414Q	HBA1/HBA2
503	0·0067559	0·0837	655·27	406·99	1·61	RZPDp9027L0210Q	SEC13
518	0·0069791	0·0839	1523·05	947·31	1·61	RZPDp9027J1216Q	C3orf45
8	0·0004327	0·0795	1339·34	838·38	1·6	RZPDp9027O1313Q	CCT2
34	0·0008429	0·0795	943·66	588·68	1·6	RZPDp9027K2417Q	PASK
38	0·0008755	0·0795	1009·92	629·97	1·6	RZPDp9027E0715Q	PHF17
48	0·0010101	0·0795	1222·82	766·22	1·6	RZPDp9027N0911Q	PODXL2
124	0·0020072	0·0795	2551·95	1594·58	1·6	RZPDp9027A1611Q	PRRT2
156	0·0024637	0·0795	865·98	541·41	1·6	RZPDp9027A2413Q	FBLL1
182	0·0026919	0·0795	1136·24	712·11	1·6	RZPDp9027O1812Q	HIRA
242	0·003461	0·0795	1135·42	711·85	1·6	RZPDp9027H1119Q	SAAL1
521	0·007039	0·0839	527·19	330·1	1·6	RZPDp9027O0816Q	GOLGA2
573	0·0077288	0·0839	573·54	357·87	1·6	RZPDp9027P0514Q	EIF3M
664	0·0094062	0·0883	539·99	336·57	1·6	E.coli_0.2 1 L2	E.coli_0.2 1 L2
666	0·0094418	0·0883	464·7	290·05	1·6	RZPDp9027F018Q	DPPA4
11	0·0004859	0·0795	917·74	576·37	1·59	RZPDp9027C1214Q	CHD3
47	0·0010041	0·0795	2723·93	1708·37	1·59	RZPDp9027N1911Q	ANK2
74	0·0013319	0·0795	1213·91	765·12	1·59	RZPDp9027C1113Q	ACAT2
148	0·0023518	0·0795	508·44	319·54	1·59	RZPDp9027L1712Q	XRN2
149	0·0023558	0·0795	761·46	479·66	1·59	RZPDp9027K1414Q	CWF19L1
198	0·0029311	0·0795	1868·39	1171·62	1·59	RZPDp9027A2314Q	STT3B
207	0·0030121	0·0795	467·96	294·21	1·59	RZPDp9027P182Q	PABPC1
312	0·0042048	0·0795	1202·99	757·81	1·59	RZPDp9027M0214Q	LRRC4B
316	0·0042558	0·0795	1112·44	701·76	1·59	RZPDp9027O0610Q	PHLPP1
354	0·0046596	0·0795	1102·8	693·34	1·59	RZPDp9027A2012Q	B3GAT1
359	0·0046891	0·0795	734·1	462·15	1·59	RZPDp9027P0512Q	RZPDp9027P0512Q
449	0·0058186	0·0796	371·2	234·12	1·59	RZPDp9027I098Q	YWHAZ
570	0·0076874	0·0839	338·66	212·38	1·59	RZPDp9027I248Q	BZRAP1
631	0·0086417	0·0853	729·39	457·6	1·59	RZPDp9027K1211Q	P4HB
644	0·0089434	0·0864	2433·71	1534·65	1·59	RZPDp9027I0116Q	ECSCR
684	0·0097856	0·0889	535·58	337·56	1·59	RZPDp9027C1718Q	RZPDp9027C1718Q
55	0·0010807	0·0795	671	425·03	1·58	RZPDp9027P222Q	AARSD1
66	0·0011824	0·0795	544·94	345·84	1·58	RZPDp9027I2313Q	PRDM8
75	0·0013413	0·0795	1074·38	680·31	1·58	RZPDp9027M0114Q	NELL2
76	0·0013541	0·0795	569·32	359·22	1·58	RZPDp9027H0112Q	RZPDp9027H0112Q
89	0·0015866	0·0795	3568·35	2259	1·58	RZPDp9027G0811Q	RZPDp9027G0811Q
92	0·0015947	0·0795	755·52	477·58	1·58	RZPDp9027E067Q	ZNF408
98	0·0016884	0·0795	1627·77	1030·9	1·58	RZPDp9027P2211Q	PSMB1
118	0·0019192	0·0795	653·25	412·51	1·58	RZPDp9027N1113Q	HSP90B1
146	0·0023304	0·0795	1085·24	688·3	1·58	RZPDp9027E1411Q	UBOX5
153	0·002419	0·0795	1355·85	859·57	1·58	RZPDp9027C2214Q	H2AFY2
199	0·0029319	0·0795	1867·03	1184·57	1·58	RZPDp9027D1314Q	KBTBD11
224	0·0032149	0·0795	434·96	275·19	1·58	RZPDp9027A1313Q	CENPT
246	0·0035041	0·0795	2515·94	1589·38	1·58	RZPDp9027P2011Q	CAPNS1
309	0·0041689	0·0795	787·81	497·41	1·58	RZPDp9027P1814Q	RZPDp9027P1814Q
319	0·0042899	0·0795	550·18	348·95	1·58	RZPDp9027O0615Q	MAP1S
337	0·0044394	0·0795	596·64	377·63	1·58	RZPDp9027O2213Q	TUBB2B
366	0·0047805	0·0795	1150·24	726·6	1·58	RZPDp9027E1313Q	RZPDp9027E1313Q
385	0·0049156	0·0795	1863·27	1177·65	1·58	RZPDp9027E1814Q	HN1
440	0·0057372	0·0796	868·48	549·56	1·58	RZPDp9027B0510Q	XRCC6
457	0·005898	0·0796	5558·63	3522·93	1·58	RZPDp9027P126Q	MATR3
527	0·0071071	0·0839	534·31	338·45	1·58	RZPDp9027F2418Q	USP14
574	0·0077741	0·0839	902·83	570·03	1·58	RZPDp9027D0712Q	OBSL1
619	0·0084714	0·0851	502·57	319	1·58	RZPDp9027C248Q	MXD4
14	0·00051	0·0795	345·79	220·01	1·57	RZPDp9027B156Q	RIMBP3 (includes others)
17	0·0005604	0·0795	858·06	546·53	1·57	RZPDp9027J2414Q	KIAA1731
65	0·0011779	0·0795	893·16	568·7	1·57	RZPDp9027E1713Q	RZPDp9027E1713Q
94	0·001637	0·0795	321·68	204·79	1·57	RZPDp9027P162Q	APP
97	0·0016818	0·0795	708·58	452·26	1·57	RZPDp9027K2312Q	CD81
192	0·0028277	0·0795	734·11	466·91	1·57	RZPDp9027J0313Q	RZPDp9027J0313Q
260	0·0037279	0·0795	1044·88	666·64	1·57	RZPDp9027B1714Q	FABP7
314	0·0042235	0·0795	3008·6	1915·62	1·57	RZPDp9027B1816Q	CCDC136
321	0·0042965	0·0795	1201·5	764·48	1·57	RZPDp9027I1214Q	CCT4
371	0·0048392	0·0795	524·54	333·75	1·57	RZPDp9027P1912Q	C20orf27
414	0·0054803	0·0796	784·98	499·98	1·57	RZPDp9027F1313Q	RNF31
430	0·0056301	0·0796	1692·09	1080·96	1·57	RZPDp9027P2414Q	SLC25A11
522	0·007052	0·0839	409·69	261·35	1·57	RZPDp9027A046Q	CENPT
585	0·0079083	0·084	2646·56	1687·2	1·57	RZPDp9027K246Q	HSP90AB1
599	0·00811	0·0842	1100·91	702·9	1·57	RZPDp9027O1514Q	NARS2
610	0·0083961	0·0851	358·7	228·8	1·57	RZPDp9027D0811Q	SLC25A1
628	0·008586	0·0851	852·24	542·23	1·57	RZPDp9027H2114Q	CXorf26
657	0·0091345	0·0866	553·42	351·82	1·57	RZPDp9027H1712Q	CHMP4A
5	0·000399	0·0795	784·08	503·44	1·56	RZPDp9027P0213Q	NELL2
22	0·0006737	0·0795	493·33	317·15	1·56	RZPDp9027H1313Q	DGKD
23	0·0006747	0·0795	2017·69	1291·76	1·56	RZPDp9027I1811Q	USF2
84	0·0015031	0·0795	1906·15	1224·43	1·56	RZPDp9027O1416Q	TMEM132A
99	0·0016942	0·0795	4177·07	2671·62	1·56	RZPDp9027B232Q	WDR82
123	0·0020039	0·0795	651·23	416·9	1·56	RZPDp9027C1115Q	ACTR3
141	0·002299	0·0795	1342·76	861·88	1·56	RZPDp9027B2414Q	ZNF585B
145	0·0023222	0·0795	904·61	581·45	1·56	RZPDp9027A0315Q	PAIP1
162	0·0024838	0·0795	1260·45	805·91	1·56	RZPDp9027N017Q	L3MBTL2
186	0·0027504	0·0795	1749·75	1122·92	1·56	RZPDp9027O1014Q	PRMT6
194	0·0028825	0·0795	1764·19	1131·63	1·56	RZPDp9027K0713Q	NHEJ1
223	0·0032124	0·0795	1677·96	1075·7	1·56	RZPDp9027F1014Q	RZPDp9027F1014Q
306	0·0041469	0·0795	1499·8	958·88	1·56	RZPDp9027B2314Q	EDC4
326	0·0043526	0·0795	1606·79	1031·57	1·56	RZPDp9027O1414Q	EDC3 (includes EG:315708)
334	0·0044114	0·0795	765·1	492	1·56	RZPDp9027N216Q	RZPDp9027N216Q
338	0·00444	0·0795	1856·81	1192·17	1·56	RZPDp9027A2112Q	POGZ
613	0·0084247	0·0851	559·81	358·62	1·56	RZPDp9027H2115Q	SAFB2
31	0·0008	0·0795	792·31	510·04	1·55	RZPDp9027O159Q	CALM1 (includes others)
60	0·0011323	0·0795	1507·74	973·58	1·55	RZPDp9027E0215Q	CALR
80	0·0014024	0·0795	534·42	344·34	1·55	RZPDp9027A0415Q	RZPDp9027A0415Q
83	0·0014209	0·0795	1448·32	935·01	1·55	RZPDp9027L2316Q	RZPDp9027L2316Q
115	0·0018973	0·0795	993·52	641·74	1·55	RZPDp9027N1010Q	XRN2
125	0·0020074	0·0795	774·44	498·67	1·55	RZPDp9027A0913Q	RZPDp9027A0913Q
128	0·0020289	0·0795	1289·98	834·93	1·55	RZPDp9027O164Q	POLR2G
140	0·0022953	0·0795	919·06	592·57	1·55	RZPDp9027J047Q	CHD3
175	0·0026495	0·0795	681·22	439·69	1·55	RZPDp9027D2313Q	NASP
204	0·0029898	0·0795	2104·47	1354·39	1·55	RZPDp9027P1911Q	LOC100129534
231	0·003334	0·0795	2297·4	1478·07	1·55	RZPDp9027M1811Q	SEZ6L2
235	0·0033864	0·0795	1205·07	777·39	1·55	RZPDp9027K0412Q	VAC14
335	0·0044231	0·0795	593·11	381·62	1·55	RZPDp9027P139Q	RZPDp9027P139Q
342	0·0044564	0·0795	681·63	438·98	1·55	RZPDp9027P019Q	CTNNA2
401	0·0052327	0·0796	1370·45	882·06	1·55	RZPDp9027P2214Q	RZPDp9027P2214Q
409	0·0053953	0·0796	794·04	511·76	1·55	RZPDp9027O0616Q	RZPDp9027O0616Q
413	0·0054796	0·0796	2327·92	1503·44	1·55	RZPDp9027N2411Q	DYNC1H1
548	0·007395	0·0839	2903·41	1870·4	1·55	RZPDp9027A2214Q	CD46
656	0·0091146	0·0866	4678·17	3026·77	1·55	RZPDp9027L246Q	RZPDp9027L246Q
9	0·0004358	0·0795	789·75	511·73	1·54	RZPDp9027J2312Q	RBM19
109	0·0018321	0·0795	3379·08	2193·03	1·54	RZPDp9027L2011Q	LOC100130872
116	0·0018996	0·0795	907·49	588·16	1·54	RZPDp9027G0313Q	GNAS
211	0·0030772	0·0795	1905·39	1238·84	1·54	RZPDp9027G0914Q	2017-03-01
215	0·0031091	0·0795	1268·81	825·24	1·54	RZPDp9027D2414Q	RZPDp9027D2414Q
276	0·0038552	0·0795	940·14	610·8	1·54	RZPDp9027D1213Q	RHOT2
308	0·0041576	0·0795	2295·87	1488·21	1·54	RZPDp9027O1814Q	UBE4A
336	0·0044294	0·0795	1208·58	787·33	1·54	RZPDp9027M036Q	CANX
340	0·0044518	0·0795	1413·05	917·06	1·54	RZPDp9027A2411Q	EIF4G3
344	0·0045126	0·0795	381·53	247·27	1·54	RZPDp9027A098Q	LPPR3
441	0·0057391	0·0796	500·32	324·3	1·54	RZPDp9027C2110Q	YWHAZ
445	0·0057687	0·0796	1033·34	671·75	1·54	RZPDp9027D1814Q	TRAP1
523	0·0070645	0·0839	1462·63	947·68	1·54	RZPDp9027A1413Q	ZBTB45
575	0·0077918	0·0839	1109·41	719·89	1·54	RZPDp9027I0114Q	HMP19
594	0·008069	0·0842	6465·33	4196·36	1·54	RZPDp9027P246Q	HMGA1
605	0·008287	0·0851	398·46	258·94	1·54	RZPDp9027B198Q	LOC100506012
677	0·009671	0·0889	346·44	224·58	1·54	RZPDp9027F2012Q	ADK
59	0·0011317	0·0795	765·31	500·83	1·53	RZPDp9027C1614Q	RZPDp9027C1614Q
71	0·0012474	0·0795	793·61	519·56	1·53	RZPDp9027D0111Q	DCX
95	0·0016432	0·0795	2009·9	1313·9	1·53	RZPDp9027B234Q	SLC4A2
110	0·0018457	0·0795	624·85	407·1	1·53	RZPDp9027E0210Q	HES6
113	0·0018672	0·0795	904·98	590·89	1·53	RZPDp9027L0316Q	YARS
120	0·0019598	0·0795	311·38	203·3	1·53	RZPDp9027P1413Q	RZPDp9027P1413Q
188	0·0027864	0·0795	3620·51	2369·53	1·53	RZPDp9027G1714Q	KCNH2
218	0·003128	0·0795	1302·53	852·99	1·53	RZPDp9027A1113Q	ADNP
229	0·0033258	0·0795	1224·68	798·95	1·53	RZPDp9027A2212Q	NSUN5P1
238	0·0034042	0·0795	1151·98	752·8	1·53	RZPDp9027N2414Q	PVRL2
266	0·0037583	0·0795	428·03	280·44	1·53	RZPDp9027G246Q	RBFOX3
297	0·0040428	0·0795	635·4	416·1	1·53	RZPDp9027E1113Q	EPS15L1
467	0·0059814	0·0796	1384·72	903·69	1·53	RZPDp9027L0214Q	PHLDB1
514	0·0069273	0·0839	1820·48	1186·59	1·53	RZPDp9027K0216Q	TMEM98
519	0·0070155	0·0839	677·67	441·93	1·53	RZPDp9027P118Q	CSAD
571	0·007712	0·0839	1385·72	904·09	1·53	RZPDp9027B0111Q	EMC10
597	0·0080929	0·0842	914·03	598·18	1·53	RZPDp9027C0314Q	RZPDp9027C0314Q
616	0·0084464	0·0851	3534·99	2311·71	1·53	RZPDp9027M2216Q	STT3A
625	0·0085611	0·0851	1178·94	769·52	1·53	RZPDp9027F0913Q	ATP6V1E1
676	0·0096446	0·0889	1273·69	832·58	1·53	RZPDp9027H1812Q	SDHB
40	0·000905	0·0795	997·26	655·49	1·52	RZPDp9027P1514Q	WDR77
62	0·0011404	0·0795	2315·82	1519·95	1·52	RZPDp9027G0616Q	BOC
103	0·0017229	0·0795	576·2	379	1·52	RZPDp9027M1313Q	FMNL1
108	0·0018249	0·0795	330·4	216·81	1·52	RZPDp9027E0410Q	NELF
144	0·0023168	0·0795	756·22	497·7	1·52	RZPDp9027P0111Q	SMARCC2
174	0·0026189	0·0795	2249·31	1475·93	1·52	RZPDp9027P0313Q	GIT1 (includes EG:216963)
200	0·0029383	0·0795	1177·04	772·87	1·52	RZPDp9027I0314Q	SPCS2
251	0·0035546	0·0795	1055·92	694·71	1·52	RZPDp9027P0715Q	DDR1
265	0·0037567	0·0795	895·22	590·59	1·52	RZPDp9027N0114Q	USP19
273	0·0038375	0·0795	559·09	367·8	1·52	RZPDp9027D1913Q	ACLY
284	0·0039699	0·0795	897·22	591·99	1·52	RZPDp9027N2314Q	CLIP2
291	0·004005	0·0795	1281·02	845·55	1·52	RZPDp9027C2414Q	RZPDp9027C2414Q
360	0·0047131	0·0795	2052·61	1354·1	1·52	RZPDp9027N1314Q	CHD3
365	0·0047782	0·0795	598·27	393·18	1·52	RZPDp9027E1213Q	KIAA0195
412	0·0054757	0·0796	4212·67	2771·6	1·52	RZPDp9027O2014Q	TMEM98
436	0·0057005	0·0796	2954·67	1947·22	1·52	RZPDp9027A2015Q	CCDC48
483	0·0063163	0·0811	320·06	210·75	1·52	RZPDp9027D138Q	MAP1A
497	0·0065873	0·0826	896·5	589·15	1·52	RZPDp9027H2213Q	ISYNA1
526	0·0071	0·0839	379·28	250·2	1·52	RZPDp9027K0613Q	PRKCSH
528	0·0071344	0·0839	1592·96	1046·82	1·52	RZPDp9027N1211Q	SMPD4
565	0·0076343	0·0839	1016·67	667·03	1·52	RZPDp9027B2114Q	KARS
627	0·0085813	0·0851	425·3	280·44	1·52	RZPDp9027G038Q	RAB14
633	0·0086861	0·0855	608·36	400·88	1·52	RZPDp9027G016Q	ARHGAP44
667	0·0094916	0·0887	3296·32	2171·8	1·52	RZPDp9027H1711Q	A1BG
687	0·00982	0·0889	342·35	225·33	1·52	RZPDp9027N1913Q	WBP1L
2	0·0003184	0·0795	329·79	218·15	1·51	RZPDp9027L2313Q	KLC4
16	0·0005542	0·0795	845·59	559·91	1·51	RZPDp9027O0215Q	PCYT1B
25	0·0007296	0·0795	1388·06	920·4	1·51	RZPDp9027G0814Q	GALK2
53	0·0010742	0·0795	789·85	522·95	1·51	RZPDp9027M1616Q	TMED3
73	0·0013118	0·0795	760·19	503·65	1·51	RZPDp9027F0812Q	CKAP5
151	0·0023656	0·0795	1369·7	909·28	1·51	RZPDp9027K2211Q	RFC2
155	0·0024293	0·0795	931·13	617·39	1·51	RZPDp9027O0914Q	C19orf52
158	0·0024725	0·0795	767·12	507·13	1·51	RZPDp9027H1714Q	RZPDp9027H1714Q
210	0·00305	0·0795	526·99	349·37	1·51	RZPDp9027A1513Q	DPYSL3
233	0·0033633	0·0795	719·61	477·39	1·51	RZPDp9027G2415Q	RZPDp9027G2415Q
234	0·0033702	0·0795	471·98	312·31	1·51	RZPDp9027J0213Q	RZPDp9027J0213Q
254	0·003617	0·0795	805·24	532·04	1·51	RZPDp9027O1614Q	DST
305	0·0041398	0·0795	1068·93	707·52	1·51	RZPDp9027P0913Q	GLRX
325	0·0043494	0·0795	1475·31	976·53	1·51	RZPDp9027M2214Q	PPP1R16A
333	0·0044086	0·0795	3168	2103·34	1·51	RZPDp9027E0114Q	CSRP2
345	0·0045145	0·0795	578·95	382·48	1·51	RZPDp9027E2416Q	PHGDH
352	0·0046349	0·0795	1766·61	1166·93	1·51	RZPDp9027O1916Q	RZPDp9027O1916Q
373	0·0048429	0·0795	1193·76	790·77	1·51	RZPDp9027P2314Q	PYGB
394	0·0050751	0·0796	1017·93	675·45	1·51	RZPDp9027M1214Q	LMO2
400	0·0052118	0·0796	635·88	422·46	1·51	RZPDp9027K1815Q	SCAF1
406	0·0052774	0·0796	1141·01	755·09	1·51	RZPDp9027C2314Q	ISCU
434	0·0056857	0·0796	771·18	509·67	1·51	RZPDp9027E016Q	TCEA2
453	0·005871	0·0796	2010·55	1329·84	1·51	RZPDp9027P1817Q	CCNC
481	0·0062825	0·0811	960·91	635·64	1·51	RZPDp9027P2014Q	PPP2R2B
580	0·0078407	0·0839	482·29	319·55	1·51	RZPDp9027B028Q	PASK
590	0·0079696	0·084	1357·04	901·34	1·51	RZPDp9027C1912Q	TMEM222
603	0·0082385	0·0851	595·17	394·11	1·51	RZPDp9027N2413Q	RZPDp9027N2413Q
642	0·0088965	0·0863	316·69	209·88	1·51	RZPDp9027K248Q	SF3A2
650	0·0090561	0·0866	522·18	346·62	1·51	RZPDp9027H058Q	DBN1
651	0·0090654	0·0866	1709·54	1130·29	1·51	positive control 0·5mg Q17 2 P21	positive control 0·5mg Q17 2 P21
668	0·0095514	0·0889	3957·17	2628·29	1·51	RZPDp9027O2214Q	HNRNPK
680	0·0097272	0·0889	840·18	557·32	1·51	RZPDp9027M0814Q	DPP9
692	0·0098731	0·0889	306·44	203·32	1·51	RZPDp9027F2412Q	ARID1A
3	0·0003311	0·0795	827·97	553·39	1·5	RZPDp9027E0614Q	USP20
35	0·0008469	0·0795	2594·84	1730·37	1·5	RZPDp9027D223Q	EIF2B5
70	0·0012474	0·0795	858·6	573·94	1·5	RZPDp9027C1416Q	NCAPD3
79	0·0013844	0·0795	828·71	552·56	1·5	RZPDp9027O1012Q	PHKB
138	0·0021546	0·0795	303·29	202·38	1·5	RZPDp9027B116Q	SEMA4D
142	0·0023006	0·0795	727·59	483·57	1·5	RZPDp9027B1614Q	TCTN3
164	0·002492	0·0795	269·83	180·33	1·5	RZPDp9027N156Q	UNC45A
167	0·0025244	0·0795	714·1	474·9	1·5	RZPDp9027B0911Q	LOC388796
222	0·0031926	0·0795	1119·49	746·09	1·5	RZPDp9027F0214Q	PDZD4
232	0·0033384	0·0795	1347·97	897·51	1·5	RZPDp9027B2014Q	RNH1
285	0·0039772	0·0795	1163·19	775·22	1·5	RZPDp9027B1112Q	DISP2
295	0·004038	0·0795	4325·09	2877·68	1·5	RZPDp9027B1715Q	ZNF827
301	0·0041068	0·0795	293·45	195·05	1·5	RZPDp9027N2013Q	GPR98
320	0·0042927	0·0795	710·49	473·2	1·5	RZPDp9027B0913Q	PPP1R10
339	0·0044443	0·0795	922·42	616·15	1·5	RZPDp9027O0711Q	PODXL2
391	0·0050086	0·0796	398·79	265·39	1·5	RZPDp9027P1914Q	CAPN2
397	0·0051423	0·0796	1107·32	736·51	1·5	RZPDp9027K0114Q	INA
419	0·0055255	0·0796	1908·9	1274·18	1·5	RZPDp9027O2414Q	ZSCAN18
424	0·0055638	0·0796	752	501·93	1·5	RZPDp9027F0914Q	C17orf108
472	0·0060914	0·0802	960·96	642·48	1·5	RZPDp9027B1814Q	FADD
509	0·006871	0·0839	692·62	461·79	1·5	RZPDp9027I2411Q	NELF
515	0·0069364	0·0839	850·1	566·65	1·5	RZPDp9027A2313Q	FAF1 (includes EG:11124)
552	0·0074654	0·0839	1685·25	1119·9	1·5	RZPDp9027P1811Q	EIF4G1
564	0·0076255	0·0839	1039·74	694·07	1·5	RZPDp9027N136Q	RZPDp9027N136Q
568	0·0076721	0·0839	606·5	403·82	1·5	RZPDp9027A0911Q	C11orf68
582	0·0078518	0·0839	942·42	629·67	1·5	RZPDp9027M0611Q	CENPB
588	0·0079643	0·084	550·03	367·58	1·5	RZPDp9027G0318Q	PTPRZ1
614	0·0084369	0·0851	315·04	209·62	1·5	RZPDp9027F038Q	RZPDp9027F038Q
623	0·0085235	0·0851	501·41	334·76	1·5	RZPDp9027P0511Q	TRIM27
15	0·0005401	0·0795	564·26	379·03	1·49	RZPDp9027O142Q	ANK3
19	0·000586	0·0795	720·9	484·25	1·49	RZPDp9027K1914Q	TBC1D1
127	0·0020161	0·0795	1898·48	1270·41	1·49	RZPDp9027E0115Q	SSR2
230	0·0033296	0·0795	842·14	564·35	1·49	RZPDp9027N2412Q	RZPDp9027N2412Q
244	0·0034635	0·0795	907·74	607·5	1·49	RZPDp9027C0114Q	PJA1
298	0·0040488	0·0795	1134·06	763·36	1·49	RZPDp9027E0814Q	RZPDp9027E0814Q
313	0·0042228	0·0795	2318·76	1559·94	1·49	RZPDp9027J2112Q	RZPDp9027J2112Q
372	0·0048395	0·0795	528·31	355·65	1·49	RZPDp9027L0513Q	PGK1
405	0·0052758	0·0796	1034·92	692·33	1·49	RZPDp9027O1016Q	ARF5
435	0·005688	0·0796	1900·26	1278·71	1·49	RZPDp9027G2116Q	GGA3
456	0·0058918	0·0796	1192·9	801·91	1·49	RZPDp9027E1014Q	LAMTOR2
480	0·0062736	0·0811	353·76	237·61	1·49	RZPDp9027M148Q	FLOT1
482	0·0062968	0·0811	1006·83	677·98	1·49	RZPDp9027J0214Q	RZPDp9027J0214Q
488	0·0063974	0·0817	836·22	562·93	1·49	RZPDp9027J205Q	TRAPPC4
504	0·0067708	0·0837	901·93	604·9	1·49	RZPDp9027C1814Q	VPS45
520	0·007037	0·0839	753·97	504·71	1·49	RZPDp9027P2012Q	LCMT1
637	0·0088003	0·0861	504·48	337·8	1·49	RZPDp9027C0417Q	SERPINA1
658	0·0091657	0·0866	758·9	508·58	1·49	RZPDp9027G1513Q	OGG1
672	0·0096206	0·0889	1299·93	874·91	1·49	RZPDp9027M173Q	GSK3A
693	0·0099079	0·0891	1713·85	1153·01	1·49	RZPDp9027D1011Q	EPB42
10	0·0004467	0·0795	1152·29	776·34	1·48	RZPDp9027C236Q	HINFP
68	0·0012226	0·0795	767·81	518·06	1·48	RZPDp9027B1611Q	ITM2C
119	0·0019508	0·0795	960·08	647·2	1·48	RZPDp9027D1311Q	HNRNPK
126	0·0020156	0·0795	923·96	622·92	1·48	RZPDp9027I2314Q	TUBA1B
136	0·0021079	0·0795	500·09	338·6	1·48	RZPDp9027P1314Q	ZNF333
172	0·0025801	0·0795	423·35	286·68	1·48	RZPDp9027G2113Q	HINT1
195	0·0028828	0·0795	489·11	330·02	1·48	RZPDp9027M1613Q	DPF1
247	0·0035085	0·0795	1263·12	852·99	1·48	RZPDp9027A083Q	CCT6A
279	0·003898	0·0795	1219·82	826·61	1·48	RZPDp9027E1311Q	RZPDp9027E1311Q
328	0·0043673	0·0795	508·56	343·18	1·48	RZPDp9027F1413Q	RAN
349	0·0045734	0·0795	303·46	204·97	1·48	RZPDp9027G048Q	RZPDp9027G048Q
383	0·0049061	0·0795	2767·63	1875·3	1·48	RZPDp9027M1014Q	RZPDp9027M1014Q
392	0·0050419	0·0796	412·82	278·25	1·48	RZPDp9027K049Q	HINFP
420	0·0055374	0·0796	298·77	201·98	1·48	RZPDp9027M158Q	SORBS2
428	0·0055996	0·0796	883·54	596·9	1·48	RZPDp9027I1913Q	ATP6V1E1
432	0·0056344	0·0796	946·63	641·66	1·48	RZPDp9027P143Q	NRBP1
452	0·005861	0·0796	1279·12	866·69	1·48	RZPDp9027K0414Q	NDUFS7
475	0·006137	0·0803	2263·58	1534·31	1·48	RZPDp9027G1214Q	TXNIP
486	0·0063328	0·0811	533·29	359·75	1·48	RZPDp9027I0213Q	TUBB2B
510	0·0068741	0·0839	719·69	487·29	1·48	positive control 0·3mg Q17 2 P19	positive control 0·3mg Q17 2 P19
513	0·0069264	0·0839	5033·28	3399·5	1·48	RZPDp9027K0711Q	RZPDp9027K0711Q
581	0·0078475	0·0839	341·45	230·98	1·48	RZPDp9027O1213Q	RANBP1
621	0·0085022	0·0851	383·73	258·77	1·48	RZPDp9027B189Q	TELO2
649	0·0090494	0·0866	711·28	480·99	1·48	RZPDp9027N1914Q	CBS
100	0·0016974	0·0795	1117·75	761·84	1·47	RZPDp9027K2216Q	NDUFA13
132	0·0020592	0·0795	468·93	317·93	1·47	RZPDp9027I2212Q	CAPZA2
135	0·0020754	0·0795	746·3	509·27	1·47	RZPDp9027K2213Q	SEZ6
196	0·0029014	0·0795	672·39	457	1·47	RZPDp9027D2411Q	ARHGEF1
253	0·0035644	0·0795	444·05	301·13	1·47	RZPDp9027B2013Q	IGF2R
283	0·0039509	0·0795	1486·05	1008·07	1·47	RZPDp9027B1014Q	KIDINS220
300	0·0041001	0·0795	533·04	363·29	1·47	RZPDp9027F036Q	GOT2
356	0·0046694	0·0795	579·57	393·82	1·47	RZPDp9027P1013Q	PSMD10
377	0·0048508	0·0795	1779·6	1210·07	1·47	RZPDp9027F1114Q	RZPDp9027F1114Q
396	0·0051224	0·0796	564·75	384·8	1·47	RZPDp9027B0912Q	SLC25A39
450	0·0058266	0·0796	331·74	226·07	1·47	RZPDp9027H146Q	PNMA6C (includes others)
478	0·0062453	0·0811	2494·21	1694·05	1·47	RZPDp9027P175Q	FKBP8
501	0·0067177	0·0835	445·79	302·83	1·47	RZPDp9027N148Q	DAK
629	0·0085897	0·0851	1676·01	1142·78	1·47	RZPDp9027I0414Q	THOC3
653	0·0090822	0·0866	521·55	353·76	1·47	RZPDp9027F1113Q	PSMD8
660	0·0091763	0·0866	505·01	343·87	1·47	RZPDp9027H048Q	COG4
682	0·0097662	0·0889	322·31	218·58	1·47	RZPDp9027M1813Q	SCAMP3
43	0·0009426	0·0795	422·59	288·82	1·46	RZPDp9027M1414Q	CKB
93	0·0016248	0·0795	701·88	481·32	1·46	RZPDp9027A1213Q	FBXL5
107	0·0018081	0·0795	825·2	564·32	1·46	RZPDp9027C1514Q	FAM32A
112	0·0018618	0·0795	795·46	546·05	1·46	RZPDp9027A0116Q	CTSD
121	0·0019842	0·0795	1115·64	763·61	1·46	RZPDp9027M229Q	ALB
131	0·0020547	0·0795	1635·62	1118·55	1·46	RZPDp9027A1416Q	QARS
139	0·0021627	0·0795	1258·57	863·21	1·46	RZPDp9027P1216Q	ULK1
177	0·0026757	0·0795	342·22	235·1	1·46	RZPDp9027P237Q	FAM32A
180	0·002686	0·0795	895·61	613·25	1·46	RZPDp9027E0414Q	AP2M1
197	0·0029026	0·0795	330·4	226·6	1·46	RZPDp9027G068Q	UBTD2
206	0·0030104	0·0795	373·97	255·85	1·46	RZPDp9027L1813Q	COPS7A
209	0·0030334	0·0795	1006·1	690·53	1·46	RZPDp9027D1114Q	UBC
225	0·0032166	0·0795	349·26	238·9	1·46	RZPDp9027N1213Q	VPS35
243	0·0034627	0·0795	1294·15	888·96	1·46	RZPDp9027C1312Q	CHD3
270	0·0038148	0·0795	1633·76	1120·42	1·46	RZPDp9027G0416Q	C11orf68
289	0·0040027	0·0795	325·37	223·46	1·46	RZPDp9027F1713Q	RZPDp9027F1713Q
330	0·0043745	0·0795	1829·36	1253·36	1·46	RZPDp9027G1414Q	PIPSL
426	0·0055668	0·0796	1356·37	926·5	1·46	RZPDp9027D2314Q	COG4
460	0·005912	0·0796	730·81	499·42	1·46	RZPDp9027D2112Q	SCARB2
463	0·0059503	0·0796	340·39	233·82	1·46	RZPDp9027H1013Q	RHOBTB2
492	0·0065139	0·0825	1423·74	976·36	1·46	RZPDp9027O1214Q	AP3B2
494	0·0065543	0·0826	1220·45	834	1·46	RZPDp9027O1115Q	RZPDp9027O1115Q
544	0·0073633	0·0839	1062·53	726·82	1·46	RZPDp9027K1812Q	SGK223
595	0·0080846	0·0842	856·23	586·53	1·46	RZPDp9027F0512Q	RZPDp9027F0512Q
600	0·0081119	0·0842	438·69	300·55	1·46	RZPDp9027O1915Q	MARS
630	0·0086164	0·0852	456·32	312·6	1·46	RZPDp9027O198Q	OGFR
691	0·0098685	0·0889	1065·22	731·2	1·46	RZPDp9027D2111Q	ARF5
32	0·0008196	0·0795	1236·48	850·32	1·45	RZPDp9027P229Q	CDH2
36	0·0008483	0·0795	1194·35	821·84	1·45	RZPDp9027E0714Q	EIF4G3
45	0·0009596	0·0795	370·64	255·76	1·45	RZPDp9027C1210Q	FAM65A
86	0·0015417	0·0795	614·09	423·31	1·45	RZPDp9027P1513Q	XRCC4
130	0·002051	0·0795	985·98	677·89	1·45	RZPDp9027F0814Q	ENOX1
134	0·0020708	0·0795	1068·39	735·9	1·45	RZPDp9027N1214Q	CCT3
147	0·0023494	0·0795	855·01	589·76	1·45	RZPDp9027A1112Q	GSTM4
213	0·0030969	0·0795	1102·59	758·78	1·45	RZPDp9027C1114Q	NOC2L
219	0·0031345	0·0795	2562·6	1771·41	1·45	RZPDp9027O1611Q	CSDC2
237	0·003404	0·0795	1054·39	726·26	1·45	RZPDp9027D1811Q	RZPDp9027D1811Q
257	0·003683	0·0795	1319·69	909·56	1·45	RZPDp9027K2215Q	MAP1LC3A
281	0·0039301	0·0795	523·88	362·03	1·45	RZPDp9027H1413Q	ZNF334
299	0·0040874	0·0795	1099·69	760·83	1·45	RZPDp9027O0611Q	SERPINA1
318	0·0042787	0·0795	1540·3	1065·39	1·45	RZPDp9027H0214Q	BSDC1
362	0·0047352	0·0795	435·7	301·24	1·45	RZPDp9027C1510Q	CNPPD1
402	0·0052341	0·0796	1938·42	1335·12	1·45	RZPDp9027K0115Q	AIDA
469	0·0059951	0·0796	1304·25	899·3	1·45	RZPDp9027C0616Q	VSTM2L
529	0·0071504	0·0839	2051·15	1417·4	1·45	RZPDp9027E153Q	NEDD4L
530	0·0071509	0·0839	1149·97	793·32	1·45	RZPDp9027C1313Q	TP53 (includes EG:22059)
550	0·0074127	0·0839	972·44	669·03	1·45	RZPDp9027M1513Q	COA5
583	0·0078521	0·0839	6232·35	4286·8	1·45	RZPDp9027G166Q	RZPDp9027G166Q
584	0·0078878	0·084	369·09	253·94	1·45	RZPDp9027I228Q	MLL5
593	0·0080682	0·0842	342·31	235·65	1·45	RZPDp9027F129Q	C1orf151-NBL1/NBL1
622	0·0085132	0·0851	1743·33	1204·55	1·45	RZPDp9027D1515Q	RNF25
63	0·0011544	0·0795	976·07	677·84	1·44	RZPDp9027C124Q	DNM1
106	0·0017531	0·0795	318·15	220·79	1·44	RZPDp9027J1913Q	RPL18
117	0·0019064	0·0795	485·61	336·36	1·44	RZPDp9027B1413Q	SOX11
176	0·0026713	0·0795	927·35	644·56	1·44	RZPDp9027N1014Q	MAST1
190	0·0028233	0·0795	654·2	454·02	1·44	RZPDp9027L2114Q	RZPDp9027L2114Q
203	0·0029854	0·0795	1077·33	745·79	1·44	RZPDp9027P1012Q	KIFAP3 (includes EG:16579)
248	0·0035137	0·0795	768·57	532·61	1·44	RZPDp9027C1414Q	CNTN1
263	0·0037419	0·0795	1107·6	771·3	1·44	RZPDp9027C0914Q	ADAMTS7
278	0·0038865	0·0795	1671·09	1161·77	1·44	RZPDp9027I2312Q	RZPDp9027I2312Q
303	0·0041127	0·0795	440·98	305·81	1·44	RZPDp9027H065Q	SULT1A3/SULT1A4
358	0·0046849	0·0795	834·6	579·05	1·44	RZPDp9027I2412Q	DENND5A
375	0·0048454	0·0795	1211·65	840·46	1·44	RZPDp9027K2014Q	MSL1 (human)
421	0·0055476	0·0796	954·41	663·23	1·44	RZPDp9027D2116Q	D2HGDH
461	0·0059362	0·0796	524·33	363·39	1·44	RZPDp9027D098Q	RZPDp9027D098Q
493	0·0065519	0·0826	1120·53	778·17	1·44	RZPDp9027P2411Q	CYCS
507	0·0068657	0·0839	453·31	315·49	1·44	RZPDp9027J2113Q	ELP2
516	0·0069596	0·0839	1263·97	879·02	1·44	RZPDp9027I0214Q	STAT6
525	0·0070944	0·0839	763·02	529·45	1·44	RZPDp9027N1311Q	SYNE2
543	0·0073611	0·0839	804·54	560·23	1·44	RZPDp9027D0214Q	C17orf81
555	0·0074932	0·0839	871·91	606·05	1·44	RZPDp9027D1914Q	RZPDp9027D1914Q
592	0·0079838	0·084	1201·31	832·4	1·44	RZPDp9027E1811Q	ARFGAP2
611	0·008403	0·0851	1520·85	1053·09	1·44	RZPDp9027B0914Q	DBI
646	0·0089834	0·0866	1236·35	858·22	1·44	RZPDp9027D1214Q	EIF3D
647	0·008993	0·0866	924·11	641·56	1·44	RZPDp9027G2115Q	PODXL2
51	0·0010328	0·0795	353·29	247·85	1·43	RZPDp9027J1313Q	AFTPH
111	0·0018472	0·0795	842·66	590·78	1·43	RZPDp9027H0714Q	RZPDp9027H0714Q
165	0·0024948	0·0795	1782·33	1243·2	1·43	RZPDp9027A2211Q	STK32C
184	0·0027171	0·0795	644·66	450·95	1·43	RZPDp9027H0814Q	VARS
216	0·0031096	0·0795	1128·66	790·83	1·43	RZPDp9027O2311Q	UBC
286	0·0039872	0·0795	610·03	426·36	1·43	RZPDp9027F039Q	TBC1D1
324	0·0043222	0·0795	869·78	609·38	1·43	RZPDp9027B1016Q	EPHB6
327	0·0043572	0·0795	966·62	674·87	1·43	RZPDp9027O0114Q	BUB3 (includes EG:12237)
329	0·0043682	0·0795	333·25	232·87	1·43	RZPDp9027C0315Q	TMEM199
353	0·0046498	0·0795	1034·6	723·05	1·43	RZPDp9027J0814Q	HNRNPUL1
459	0·0059017	0·0796	453·64	316·51	1·43	RZPDp9027J245Q	FBXO21
466	0·0059777	0·0796	354·99	247·98	1·43	RZPDp9027H1713Q	PHAX
468	0·005987	0·0796	522·13	366·25	1·43	RZPDp9027F2212Q	DUSP8
517	0·0069776	0·0839	936·63	654·69	1·43	RZPDp9027D1616Q	ARMCX3
540	0·0073428	0·0839	966·12	674·95	1·43	RZPDp9027I0514Q	FBLN2
559	0·0075541	0·0839	874·27	613·43	1·43	RZPDp9027N2014Q	MRPS23
561	0·0075746	0·0839	731·76	512·67	1·43	RZPDp9027H0614Q	HK1
562	0·0075865	0·0839	569·65	398·02	1·43	RZPDp9027D0511Q	C1orf122
566	0·0076544	0·0839	1207·65	846·22	1·43	RZPDp9027N2311Q	DEDD2
576	0·0078071	0·0839	419·39	292·97	1·43	RZPDp9027O1013Q	CHCHD7
587	0·0079516	0·084	1438·61	1006·64	1·43	RZPDp9027H0114Q	FAT4
607	0·00835	0·0851	664·55	465·72	1·43	RZPDp9027O082Q	RZPDp9027O082Q
659	0·0091676	0·0866	621·56	435·68	1·43	RZPDp9027L1810Q	CBR1 (includes EG:100360507)
661	0·0092326	0·087	1033·27	721·12	1·43	RZPDp9027M2114Q	RZPDp9027M2114Q
665	0·0094341	0·0883	940·01	655·84	1·43	RZPDp9027B0118Q	RZPDp9027B0118Q
13	0·0005088	0·0795	2001·92	1412·73	1·42	RZPDp9027K072Q	MAPK8IP3
26	0·0007581	0·0795	1554·5	1093·03	1·42	RZPDp9027A1116Q	ME3
52	0·0010368	0·0795	1448·1	1021·25	1·42	positive control 0·5mg Q17 4 N15	positive control 0·5mg Q17 4 N15
64	0·0011587	0·0795	860·54	607·31	1·42	RZPDp9027P1313Q	CNBP
81	0·0014058	0·0795	794·19	560·36	1·42	RZPDp9027H0514Q	RZPDp9027H0514Q
122	0·0020007	0·0795	734·52	518·53	1·42	RZPDp9027E0612Q	PIP5K1B
187	0·0027825	0·0795	905·72	639·62	1·42	RZPDp9027O1216Q	ATP9A
205	0·0029978	0·0795	457·74	322·3	1·42	RZPDp9027O107Q	RAD1
294	0·0040322	0·0795	1049·88	740·26	1·42	RZPDp9027I2114Q	JPH3
310	0·0041814	0·0795	547·47	384·4	1·42	RZPDp9027D1611Q	TINAGL1
332	0·0044059	0·0795	792·95	559·65	1·42	RZPDp9027C0514Q	THUMPD3
382	0·0049047	0·0795	527·95	371·43	1·42	RZPDp9027G0615Q	CIC
387	0·0049623	0·0796	288·57	203·12	1·42	RZPDp9027A129Q	PTPRK
390	0·0050007	0·0796	506·47	356·05	1·42	RZPDp9027P0113Q	TTC5
454	0·0058753	0·0796	473·58	334·65	1·42	RZPDp9027L0914Q	CWF19L1
476	0·006139	0·0803	472·79	332·15	1·42	RZPDp9027H0313Q	SMCHD1
542	0·0073532	0·0839	1399·41	988	1·42	RZPDp9027A1815Q	RZPDp9027A1815Q
618	0·0084686	0·0851	506·82	357·42	1·42	RZPDp9027J1413Q	TUBB8
640	0·0088722	0·0863	1059·71	746·29	1·42	RZPDp9027B2016Q	GLYCTK
641	0·0088885	0·0863	1287·12	904·2	1·42	RZPDp9027C1915Q	RZPDp9027C1915Q
681	0·0097586	0·0889	1765·13	1246·82	1·42	RZPDp9027F1412Q	MRPS2
49	0·0010145	0·0795	945·03	670·46	1·41	RZPDp9027N1514Q	GPT2 (includes EG:108682)
87	0·0015643	0·0795	1425·9	1013·07	1·41	RZPDp9027L1911Q	BCAM
150	0·0023598	0·0795	601·05	425·51	1·41	RZPDp9027O146Q	TRIM46
154	0·0024259	0·0795	806·17	573·09	1·41	RZPDp9027O0515Q	RZPDp9027O0515Q
173	0·0025984	0·0795	735·14	523·22	1·41	RZPDp9027I2014Q	PYGB
183	0·0027031	0·0795	362·95	257·66	1·41	RZPDp9027O158Q	HPS6
226	0·0032477	0·0795	631·31	447·09	1·41	RZPDp9027F0811Q	ADK
239	0·003409	0·0795	1049·61	744·65	1·41	RZPDp9027J1916Q	ALG3
245	0·0034737	0·0795	969·47	685·7	1·41	RZPDp9027F0714Q	RZPDp9027F0714Q
256	0·0036821	0·0795	702·2	499·29	1·41	RZPDp9027N115Q	RZPDp9027N115Q
269	0·0038074	0·0795	687·82	487·4	1·41	RZPDp9027L0812Q	SGSM3
288	0·0040007	0·0795	2404·97	1708·93	1·41	RZPDp9027A233Q	FNDC4
317	0·0042715	0·0795	965·05	682·82	1·41	RZPDp9027L2311Q	TMEM59L
393	0·0050437	0·0796	369·4	261·28	1·41	RZPDp9027H0513Q	PA2G4
404	0·0052535	0·0796	745·23	529·38	1·41	RZPDp9027F1815Q	PCID2
410	0·0054077	0·0796	921·51	655·85	1·41	RZPDp9027E0214Q	SRXN1
437	0·0057036	0·0796	1221·31	864·61	1·41	RZPDp9027G116Q	PAIP1
473	0·0060977	0·0802	1024·23	728·41	1·41	RZPDp9027E0314Q	KIAA0930
487	0·0063416	0·0811	986·06	698·39	1·41	RZPDp9027I2113Q	NARFL
499	0·0066153	0·0826	1046·09	739·61	1·41	RZPDp9027G0114Q	TMCC2
508	0·0068673	0·0839	744·52	528·28	1·41	RZPDp9027E136Q	RZPDp9027E136Q
533	0·0072152	0·0839	1191·81	842·45	1·41	RZPDp9027J0712Q	RZPDp9027J0712Q
535	0·0072298	0·0839	881·12	623·43	1·41	RZPDp9027L0911Q	RZPDp9027L0911Q
538	0·007305	0·0839	982·34	695·73	1·41	RZPDp9027M0910Q	CTNNA1
636	0·0087735	0·0859	293·48	207·6	1·41	RZPDp9027N236Q	ARFGAP2
690	0·0098634	0·0889	504·51	357·71	1·41	RZPDp9027E0418Q	PPA1
697	0·0099907	0·0893	800·95	569·84	1·41	RZPDp9027M2117Q	FAM127B
42	0·0009402	0·0795	704·8	504·99	1·4	RZPDp9027B1214Q	MINK1
91	0·001592	0·0795	568·87	407·43	1·4	RZPDp9027E046Q	FNTB
137	0·0021136	0·0795	803·78	574·53	1·4	RZPDp9027E0514Q	APC
169	0·0025346	0·0795	935·87	667·11	1·4	RZPDp9027F0314Q	STK38
181	0·0026903	0·0795	427·71	305·88	1·4	RZPDp9027H069Q	LRIG1
201	0·0029705	0·0795	445·76	319·12	1·4	RZPDp9027F0713Q	RZPDp9027F0713Q
212	0·0030967	0·0795	743	528·83	1·4	RZPDp9027K1114Q	RZPDp9027K1114Q
214	0·0031019	0·0795	383·45	274·43	1·4	RZPDp9027E066Q	RZPDp9027E066Q
227	0·003279	0·0795	747·68	533·9	1·4	RZPDp9027L2214Q	RZPDp9027L2214Q
228	0·0033001	0·0795	786·63	563·37	1·4	RZPDp9027N245Q	STIP1
271	0·0038153	0·0795	672·28	480·34	1·4	RZPDp9027P092Q	TTC3
280	0·0039128	0·0795	653·28	466·1	1·4	RZPDp9027N1114Q	SRR
341	0·0044563	0·0795	760·69	545·01	1·4	RZPDp9027B1010Q	CLTA
355	0·0046605	0·0795	1957·43	1402·31	1·4	RZPDp9027I2316Q	RZPDp9027I2316Q
370	0·004837	0·0795	428·61	305·18	1·4	RZPDp9027F0813Q	HSP90AB1
384	0·0049102	0·0795	452·11	324·06	1·4	RZPDp9027P149Q	SF3A1
415	0·0054812	0·0796	969·75	691·56	1·4	RZPDp9027I0715Q	SLC3A2
439	0·0057064	0·0796	908·22	649·51	1·4	RZPDp9027A0114Q	SYNGR2
444	0·0057673	0·0796	818·76	586·07	1·4	RZPDp9027C1610Q	USP20
512	0·0068938	0·0839	724·34	517·9	1·4	RZPDp9027P2112Q	CSF1R
602	0·0082034	0·0849	494·74	354·41	1·4	RZPDp9027H0213Q	RZPDp9027H0213Q
674	0·0096329	0·0889	696·6	497·56	1·4	RZPDp9027O213Q	RZPDp9027O213Q
12	0·0005017	0·0795	754·44	541·13	1·39	RZPDp9027F0413Q	NEURL4
18	0·0005617	0·0795	849·23	610·77	1·39	RZPDp9027M0115Q	AKR1C4
20	0·0006232	0·0795	1851·15	1336·35	1·39	RZPDp9027E055Q	CUX1
157	0·0024705	0·0795	363·86	262·57	1·39	RZPDp9027D1313Q	MED17
236	0·0033928	0·0795	505·75	364·41	1·39	RZPDp9027D1412Q	EEF1G
282	0·0039362	0·0795	805·89	581·08	1·39	RZPDp9027F0414Q	MRPL23
292	0·0040145	0·0795	1913·38	1377·95	1·39	RZPDp9027I1711Q	RZPDp9027I1711Q
302	0·0041115	0·0795	428·4	309·16	1·39	RZPDp9027G0713Q	C17orf62
311	0·0041868	0·0795	391·97	282·33	1·39	RZPDp9027H1813Q	ZFP161
386	0·0049364	0·0796	397·32	284·83	1·39	RZPDp9027B1211Q	USP11
411	0·0054368	0·0796	430·64	308·77	1·39	RZPDp9027F066Q	PLEKHJ1
431	0·0056338	0·0796	643·16	461·37	1·39	RZPDp9027N0514Q	NOMO1 (includes others)
458	0·0058986	0·0796	711·79	511·5	1·39	RZPDp9027K2210Q	DDX55
471	0·0060761	0·0802	414·08	297·18	1·39	RZPDp9027O232Q	RZPDp9027O232Q
537	0·0072374	0·0839	702·99	504·61	1·39	RZPDp9027M1515Q	LPPR3
541	0·0073496	0·0839	1954·02	1403·12	1·39	RZPDp9027P2111Q	UBA52
545	0·0073744	0·0839	1097·69	791·62	1·39	RZPDp9027B2416Q	MAPRE3
572	0·007721	0·0839	485·28	347·96	1·39	RZPDp9027O0912Q	TFPI2
579	0·0078343	0·0839	614·24	440·93	1·39	RZPDp9027H225Q	ISOC1
606	0·0083324	0·0851	333·6	240·82	1·39	RZPDp9027K2413Q	RUNDC3A
685	0·0097987	0·0889	1466·87	1058·43	1·39	RZPDp9027A1215Q	AK5
160	0·0024764	0·0795	843·26	610·01	1·38	RZPDp9027F0316Q	RZPDp9027F0316Q
170	0·0025415	0·0795	749·52	542·2	1·38	RZPDp9027L1915Q	NUDT11
193	0·0028741	0·0795	1486·64	1079·33	1·38	RZPDp9027A1011Q	HNRPLL
322	0·0043005	0·0795	858·93	623·72	1·38	RZPDp9027I2116Q	FBXW5
422	0·0055628	0·0796	1526·54	1110·21	1·38	RZPDp9027N2416Q	PHGDH
479	0·0062466	0·0811	623·67	452·35	1·38	RZPDp9027D0116Q	PPP4C
490	0·0064912	0·0825	622·55	451·09	1·38	RZPDp9027H076Q	CSNK1G2
546	0·0073755	0·0839	553·35	401·07	1·38	RZPDp9027C1211Q	DTX1
553	0·0074737	0·0839	740·73	535·31	1·38	RZPDp9027P0216Q	AKAP1
569	0·0076772	0·0839	293·12	211·7	1·38	RZPDp9027M138Q	UBL7
591	0·0079776	0·084	465·24	336·96	1·38	RZPDp9027G0813Q	RPL36A
635	0·0087686	0·0859	597·66	433·24	1·38	RZPDp9027A229Q	ZNRF1
654	0·0090915	0·0866	1339·75	968·22	1·38	RZPDp9027M1814Q	CDK9
688	0·0098214	0·0889	782·04	568·59	1·38	RZPDp9027B0511Q	CORO1B
163	0·0024849	0·0795	712·64	518·67	1·37	RZPDp9027C1411Q	NUP88
179	0·002683	0·0795	1004·18	732·18	1·37	RZPDp9027I1015Q	PELP1
259	0·0037006	0·0795	417·07	304·81	1·37	RZPDp9027B1412Q	FCGRT
315	0·0042432	0·0795	1072·08	785·01	1·37	RZPDp9027N1011Q	VPS8 (includes EG:209018)
331	0·0044022	0·0795	2077·48	1514·82	1·37	RZPDp9027A244Q	RZPDp9027A244Q
350	0·0045895	0·0795	1052·71	767·94	1·37	RZPDp9027G1816Q	SNX17
363	0·0047575	0·0795	423·99	308·67	1·37	RZPDp9027N177Q	RPA3
442	0·0057462	0·0796	399·38	292·56	1·37	RZPDp9027D136Q	FAAH
447	0·0057815	0·0796	1472·16	1074·15	1·37	RZPDp9027J1911Q	MEX3B
506	0·0068423	0·0839	2078·01	1517·9	1·37	RZPDp9027L063Q	TBC1D14
554	0·0074758	0·0839	748·28	547·7	1·37	RZPDp9027D1316Q	NECAP1
577	0·0078094	0·0839	1383·45	1009·45	1·37	positive control 0·5mg Q17 16 E16	positive control 0·5mg Q17 16 E16
578	0·0078304	0·0839	458·84	334·99	1·37	RZPDp9027M1611Q	ZNF74
598	0·0081088	0·0842	2331·87	1703·63	1·37	RZPDp9027A062Q	SYT3
24	0·0007204	0·0795	769·9	566·34	1·36	RZPDp9027F0515Q	RZPDp9027F0515Q
208	0·0030176	0·0795	631·37	464·54	1·36	RZPDp9027E1812Q	EIF3C/EIF3CL
241	0·0034462	0·0795	926·67	683·59	1·36	RZPDp9027K195Q	AKR1A1
307	0·0041474	0·0795	305·48	224·78	1·36	RZPDp9027I2213Q	ALKBH2
368	0·0048308	0·0795	1754·35	1290·37	1·36	RZPDp9027P224Q	RAD23A
389	0·0049762	0·0796	1140·17	838·53	1·36	RZPDp9027F0114Q	AMFR
416	0·0054873	0·0796	1418·68	1046·19	1·36	RZPDp9027P1511Q	C17orf76-AS1
427	0·0055745	0·0796	919·48	674·66	1·36	RZPDp9027I2416Q	RZPDp9027I2416Q
446	0·0057749	0·0796	928·25	680·82	1·36	RZPDp9027G0614Q	NACA
485	0·0063324	0·0811	892·42	657·39	1·36	RZPDp9027P1411Q	RBM10
498	0·006612	0·0826	584·23	430·85	1·36	RZPDp9027C0415Q	TXNDC17
505	0·0068016	0·0839	1026·06	752·35	1·36	RZPDp9027I0515Q	LRRC4B
549	0·0073995	0·0839	1079·34	793·88	1·36	RZPDp9027K2116Q	LRRC4C
612	0·0084108	0·0851	1063·16	783·72	1·36	RZPDp9027I1814Q	STIP1
673	0·0096273	0·0889	546·98	401·74	1·36	RZPDp9027H2216Q	SMPD4
679	0·0097264	0·0889	1039·35	765·32	1·36	RZPDp9027G0514Q	LHX1
686	0·0098067	0·0889	708·27	520·08	1·36	RZPDp9027L056Q	SGSM3
85	0·0015138	0·0795	1832·5	1359·63	1·35	RZPDp9027B244Q	TTYH3
159	0·0024731	0·0795	466·89	347·02	1·35	RZPDp9027E087Q	SEC13
296	0·0040392	0·0795	925·53	685·78	1·35	RZPDp9027F0614Q	PCIF1
346	0·0045496	0·0795	843·22	623·03	1·35	RZPDp9027H0616Q	SLC25A6
417	0·0055024	0·0796	745·65	552·35	1·35	RZPDp9027G1815Q	DOC2A
425	0·0055646	0·0796	932·65	689·05	1·35	RZPDp9027B1114Q	TMSB10/TMSB4X
539	0·0073116	0·0839	781·43	579·44	1·35	RZPDp9027K2411Q	R3HDM1
558	0·0075409	0·0839	659·37	488·43	1·35	RZPDp9027H0715Q	PKM
560	0·0075681	0·0839	811·24	599·05	1·35	RZPDp9027L2416Q	ARPP19
624	0·0085534	0·0851	1248·99	923·08	1·35	RZPDp9027D2416Q	FLYWCH1
634	0·0087196	0·0857	417·69	309·41	1·35	RZPDp9027L0913Q	PRMT1
639	0·0088547	0·0863	1655·08	1225·68	1·35	RZPDp9027F0116Q	SGK223
670	0·0095686	0·0889	552·36	408·44	1·35	RZPDp9027J0913Q	STK17A
689	0·0098311	0·0889	1546·49	1144·44	1·35	RZPDp9027G1114Q	PGD
696	0·0099739	0·0893	544·68	403·13	1·35	RZPDp9027D1416Q	TRIM28
27	0·0007662	0·0795	854·36	638·8	1·34	RZPDp9027E0515Q	FAM160B2
178	0·0026795	0·0795	1423·41	1058·67	1·34	RZPDp9027D245Q	GSTP1
252	0·0035603	0·0795	1003·89	747·88	1·34	RZPDp9027F0711Q	UBXN11
264	0·0037537	0·0795	1025·14	767·05	1·34	RZPDp9027H0315Q	CAPZA2
369	0·0048369	0·0795	763·91	568·15	1·34	RZPDp9027I2315Q	HSPA13
374	0·0048453	0·0795	671·97	500·98	1·34	RZPDp9027D1414Q	FMNL2
376	0·0048506	0·0795	854·49	639·3	1·34	RZPDp9027H0312Q	NDRG2
398	0·0051699	0·0796	768·31	575·13	1·34	RZPDp9027H0711Q	RBM22
462	0·0059482	0·0796	557·04	415·03	1·34	RZPDp9027O1516Q	FPGS
470	0·0060297	0·0799	601·16	449·39	1·34	RZPDp9027F0416Q	POR
477	0·0062424	0·0811	533·56	398·89	1·34	RZPDp9027E1714Q	BCKDHA
547	0·0073782	0·0839	745·95	555·21	1·34	RZPDp9027H0311Q	NBEA
645	0·0089457	0·0864	788·39	589·79	1·34	RZPDp9027N1117Q	AHSG
648	0·0090173	0·0866	1193·33	890·99	1·34	RZPDp9027C0215Q	FAM65A
133	0·002068	0·0795	2763·01	2077·85	1·33	RZPDp9027P105Q	CARHSP1
166	0·0025214	0·0795	1077·45	812·28	1·33	RZPDp9027B134Q	MSH6
220	0·0031394	0·0795	699	525·58	1·33	RZPDp9027O204Q	NVL
250	0·0035451	0·0795	1093·61	819·72	1·33	RZPDp9027B1315Q	RXRB
255	0·0036542	0·0795	939·62	707·88	1·33	RZPDp9027I0914Q	FNTB
262	0·0037334	0·0795	949·55	712·67	1·33	RZPDp9027M126Q	PCDH12
287	0·0039968	0·0795	1794·22	1352·82	1·33	RZPDp9027H013Q	PSMD10
348	0·0045597	0·0795	971·96	728·93	1·33	RZPDp9027D152Q	RZPDp9027D152Q
407	0·0053125	0·0796	776·91	582·1	1·33	RZPDp9027A1216Q	DYNC1LI2
423	0·0055632	0·0796	890·32	667·34	1·33	RZPDp9027L1012Q	RANBP2
511	0·0068808	0·0839	660·32	498·03	1·33	RZPDp9027B1212Q	RZPDp9027B1212Q
524	0·0070653	0·0839	692·79	521·68	1·33	RZPDp9027G126Q	THOC5
609	0·0083903	0·0851	1183·85	889·8	1·33	RZPDp9027E0616Q	LOC440354
626	0·0085769	0·0851	1603·76	1205·39	1·33	RZPDp9027L1816Q	RZPDp9027L1816Q
638	0·0088263	0·0862	904·73	681·99	1·33	RZPDp9027B1511Q	ARHGEF11
663	0·0093274	0·0876	348·58	261·58	1·33	RZPDp9027K235Q	FBN3
669	0·0095533	0·0889	929·12	696·7	1·33	RZPDp9027O166Q	EPRS
675	0·009636	0·0889	270·91	204·17	1·33	RZPDp9027C1516Q	DCAF5
683	0·0097743	0·0889	846·05	635·02	1·33	RZPDp9027L1818Q	RZPDp9027L1818Q
267	0·0037666	0·0795	883·72	669·82	1·32	RZPDp9027P145Q	ENTPD6
357	0·0046812	0·0795	867·83	655·23	1·32	negative control Q17 11 J23	negative control Q17 11 J23
367	0·004829	0·0795	526·58	398·73	1·32	RZPDp9027N067Q	A2M
395	0·0051126	0·0796	784·39	592·23	1·32	RZPDp9027B1414Q	RABAC1
408	0·0053871	0·0796	1476·03	1121·32	1·32	RZPDp9027M055Q	CPNE2
418	0·005509	0·0796	1223·25	926·68	1·32	RZPDp9027F0616Q	RZPDp9027F0616Q
465	0·0059584	0·0796	1220·76	921·67	1·32	RZPDp9027K2416Q	CUL9
563	0·0076242	0·0839	808·43	611·59	1·32	RZPDp9027B1215Q	SPIRE2
617	0·008456	0·0851	785·44	595·66	1·32	RZPDp9027C226Q	CANX
632	0·0086569	0·0853	752·65	569·65	1·32	RZPDp9027E1715Q	DLG5
168	0·0025253	0·0795	604·4	459·87	1·31	RZPDp9027G0610Q	STK16
189	0·0028228	0·0795	1038·68	791·08	1·31	RZPDp9027K1315Q	CCT8
403	0·0052497	0·0796	1032·76	789·03	1·31	RZPDp9027I2215Q	TUBB2B
429	0·0056267	0·0796	1589·19	1214·83	1·31	RZPDp9027J173Q	RZPDp9027J173Q
484	0·0063225	0·0811	499·57	381·43	1·31	RZPDp9027C1212Q	FAM131A
496	0·0065774	0·0826	729·01	557·4	1·31	RZPDp9027K2212Q	GFM2
532	0·0072052	0·0839	704·84	539·07	1·31	RZPDp9027F0415Q	CAT
534	0·0072179	0·0839	816·74	621·13	1·31	RZPDp9027D1915Q	APBB1
596	0·0080906	0·0842	748·65	572	1·31	RZPDp9027G1715Q	LOC100130987
601	0·0081306	0·0843	775·25	591·35	1·31	RZPDp9027F1915Q	PRMT2
347	0·0045592	0·0795	1194·88	918·74	1·3	RZPDp9027M132Q	SEMA4F
378	0·0048523	0·0795	1677·2	1294	1·3	RZPDp9027P124Q	CCDC56
438	0·005705	0·0796	1294·32	997·13	1·3	RZPDp9027D097Q	ANTXR2
536	0·0072369	0·0839	1606·14	1234·9	1·3	RZPDp9027O184Q	STAP2
557	0·007517	0·0839	301·07	232·22	1·3	RZPDp9027O156Q	RAD51C
643	0·0089385	0·0864	749	573·96	1·3	RZPDp9027G0716Q	MTCH2
652	0·0090806	0·0866	795·85	610·17	1·3	RZPDp9027I2016Q	BZW2
655	0·0091143	0·0866	813·08	627·52	1·3	RZPDp9027J2115Q	ATAT1
343	0·004486	0·0795	1151·67	890·47	1·29	RZPDp9027B132Q	YWHAE
448	0·0057979	0·0796	1150·39	890·79	1·29	RZPDp9027D114Q	CBS
464	0·0059512	0·0796	900·17	697·07	1·29	RZPDp9027O036Q	POTEE/POTEF
495	0·0065705	0·0826	1201·72	934·65	1·29	RZPDp9027J1715Q	NAGK
531	0·0071962	0·0839	633·69	492·53	1·29	RZPDp9027B0216Q	DGKD
589	0·0079651	0·084	1766·32	1365·33	1·29	RZPDp9027O172Q	PDIA6
662	0·0092872	0·0874	2096·19	1625·84	1·29	RZPDp9027I043Q	PRIM1
221	0·0031844	0·0795	1083·84	844·98	1·28	RZPDp9027O154Q	PAICS
388	0·0049706	0·0796	732·04	571·8	1·28	RZPDp9027A016Q	RZPDp9027A016Q
694	0·0099431	0·0892	5156·13	4026·45	1·28	RZPDp9028J024Q	HCG18
502	0·0067512	0·0837	490·52	386·65	1·27	RZPDp9027L0912Q	ALB
556	0·0075159	0·0839	1315·91	1039·04	1·27	RZPDp9027M1111Q	L1CAM
586	0·007945	0·084	1257·27	990·05	1·27	RZPDp9027H214Q	HSD17B7P2
620	0·0084773	0·0851	778·25	613·26	1·27	RZPDp9027H055Q	HNRNPM
604	0·0082728	0·0851	1368·23	1088·48	1·26	RZPDp9027P165Q	METTL3
608	0·0083889	0·0851	1788·01	1424·35	1·26	RZPDp9027K104Q	RZPDp9027K104Q
678	0·0097254	0·0889	4605·65	3645·09	1·26	RZPDp9028N234Q	AP2A1
615	0·0084424	0·0851	13621·65	29200·19	0·47	RZPDp9027L2315Q	STMN4
249	0·0035302	0·0795	16898·11	44185·68	0·38	RZPDp9027D0314Q	STMN4
Filtering parameters:
R version 3.2.4 Revised (2016-03-16 r70336)
Name of the project file: Project_LMU.xlsx
BRB-ArrayTools Version: 4.5.0 - Beta_2 (September 2015)
Spot Filters:
Threshold the intensity at the minumum value if the intensity is below the minimum value: 100
Exclude the spot if the Spot Flag contains numeric values outside the range: 0 to 0
Average the replicate spots within an array: ON
Normalization:
Normalize (center) each array using relative median over all genes.
Used median array as reference array 1.
Exclude a gene under any of the following conditions:
Less than 20 % of expression data have at least a 1.5 -fold change in either direction from gene's median value
Percent of data missing or filtered out exceeds 50 %
50th Percentile of intensities is less than 250
Gene Subsets: OFF
